# Supplementary material for: Electrochemical recognition of charged species using quaternary ammonium binaphthyl salts.
Source: Royal Society of Chemistry journal article supplement (doi:10.1039/b105862m), 2001-10-16
Supplement: nmr_data.doc [file nmr_data.doc]

**Supplementary Information**.

The 1H NMR spectra of 4,5-dihydrospiro[3H-dinaphth[2,1-c:1’, 2’-e]azepine-4,4’-piperazinium] bromide, the effects of addition of TEA *para*-toluene sulfonate.

1D and 2D NMR experiments were ran in d3-MeCN. The chemical shifts are listed, with the appropriate assignments

1H NMR (d3-MeCN) ;

3.1 (m, 2H, H a/a’eq)

3.3 (m, 4H, H a/a’ax+ H b/b’eq)

3.5 (m, 2H, H b/b’ax)

3.8 (d, 2H, Haq)

4.8 (d, 2H, Heq)

7.4 (quintet, 4H, 7/7’ +8/8’)

7.6 (t, 2H, 6/6’)

7.8 (d, 2H 3/3’)

8.2 (d, 2H, 5/5’)

8.3 (d, 2H, 4/4’)

1H NMR assignment has been accomplished using 2D correlation from the COSY and NOESY spectra.

TEA *para*-toluenesulfonate: Changes in the spectra of the binaphthyl 1H NMR:

The methylene hydrogen environment at 3.8 ppm is shifted by -0.05 ppm. This signal has been attributed to the axial methylene proton (Hax). The methylene signal at 4.8 ppm (Heq) appears to remain unchanged.

There is a change in fine structure for the proton environments at 3.1, 3.3 and 3.5 ppm, which correspond to the a/a’eq, a/a’ax + b/beq and b/b’ax environments respectively. The change in the fine structure at 3.1 ppm is partly masked by the CH2 signal from the TEA+ unit.
